# Supplementary material for: NF-κB Signaling Modulates miR-452-5p and miR-335-5p Expression to Functionally Decrease Epithelial Ovarian Cancer Progression in Tumor-Initiating Cells
Source: MDPI journal article supplement (doi:10.3390/ijms24097826), 2023-04-25

Supplementary Table S1: List of miRNA Probes and their sequences

| Target Probe   | Mature miRNA Sequence  | Assay ID   |
|----------------|------------------------|------------|
| hsa-miR-30e-5p | UGUAAACAUCCUUGACUGGAAG | 479235_mir |
| hsa-miR-452-5p | AACUGUUUGCAGAGGAAACUGA | 478109_mir |
| hsa-miR-335-5p | UCAAGAGCAAUACGAAAAAUGU | 478324_mir |

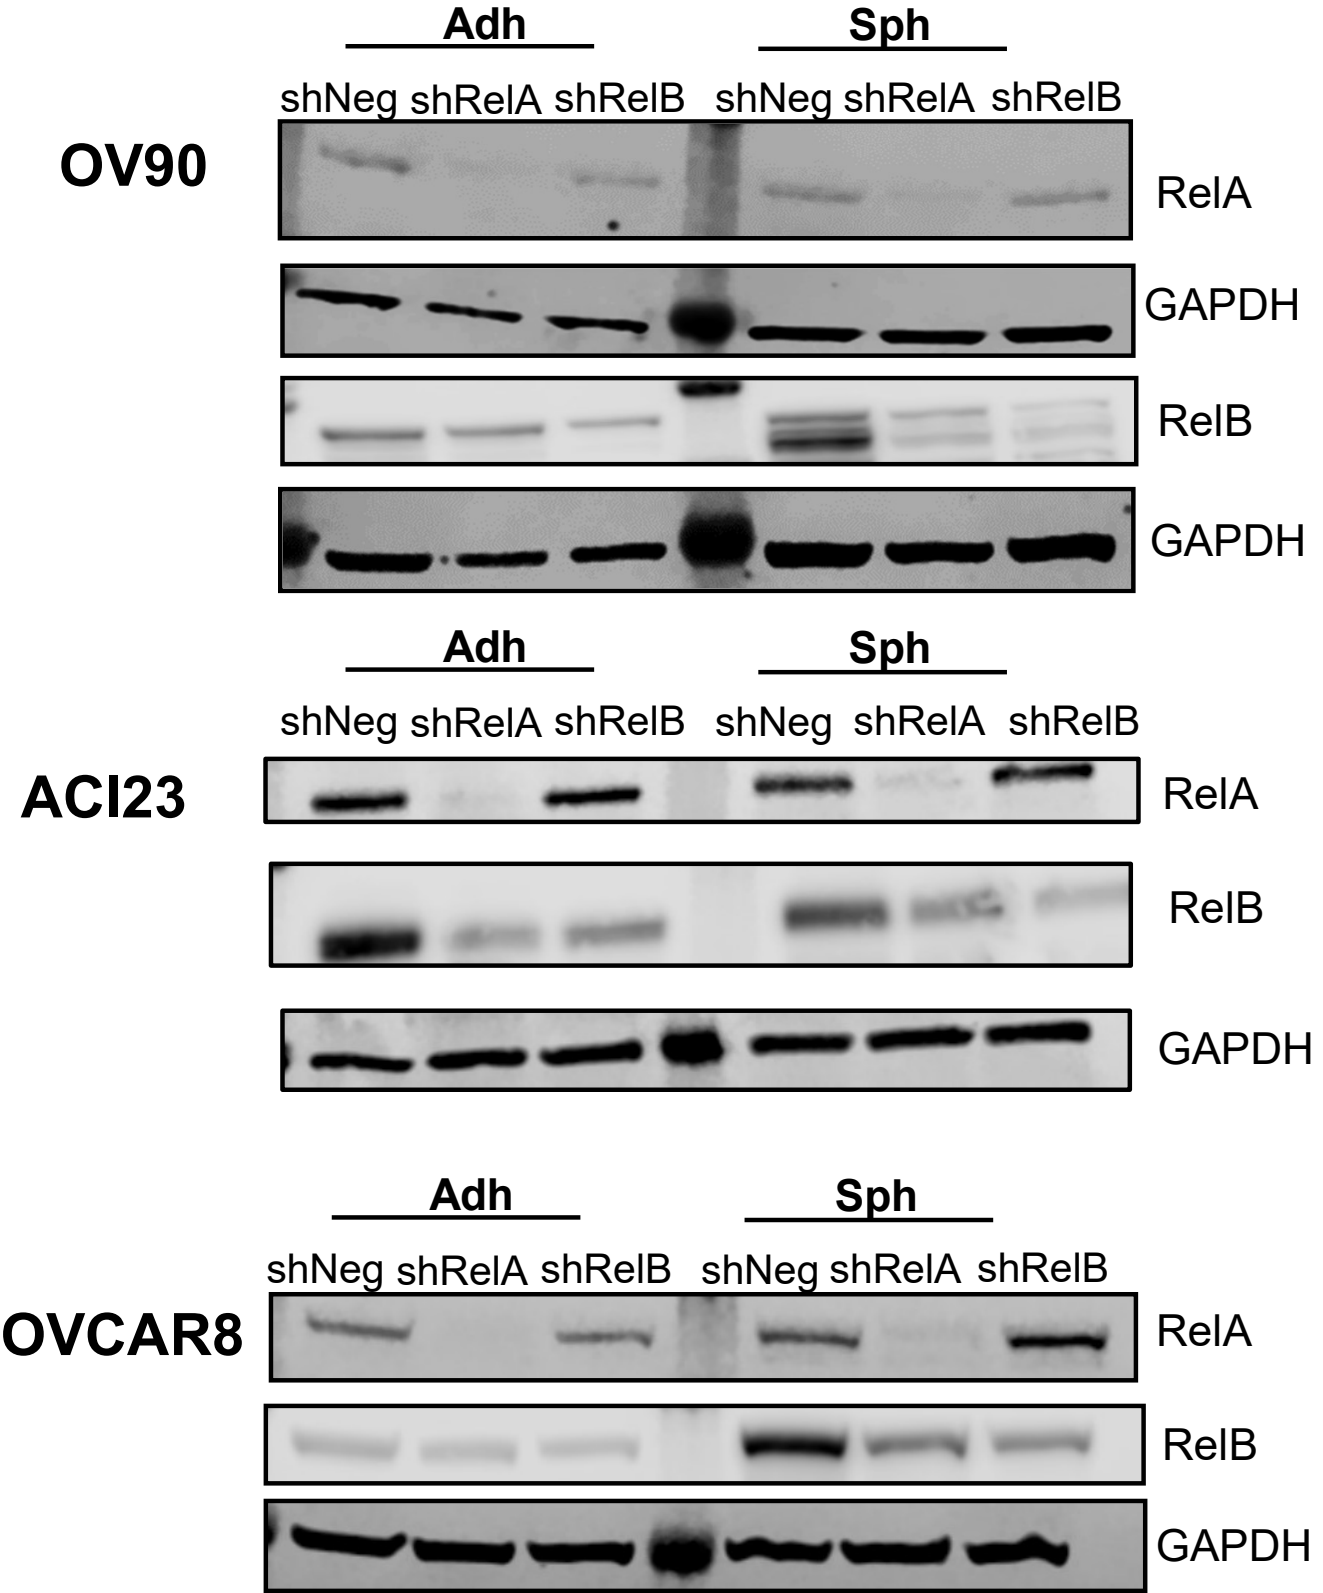

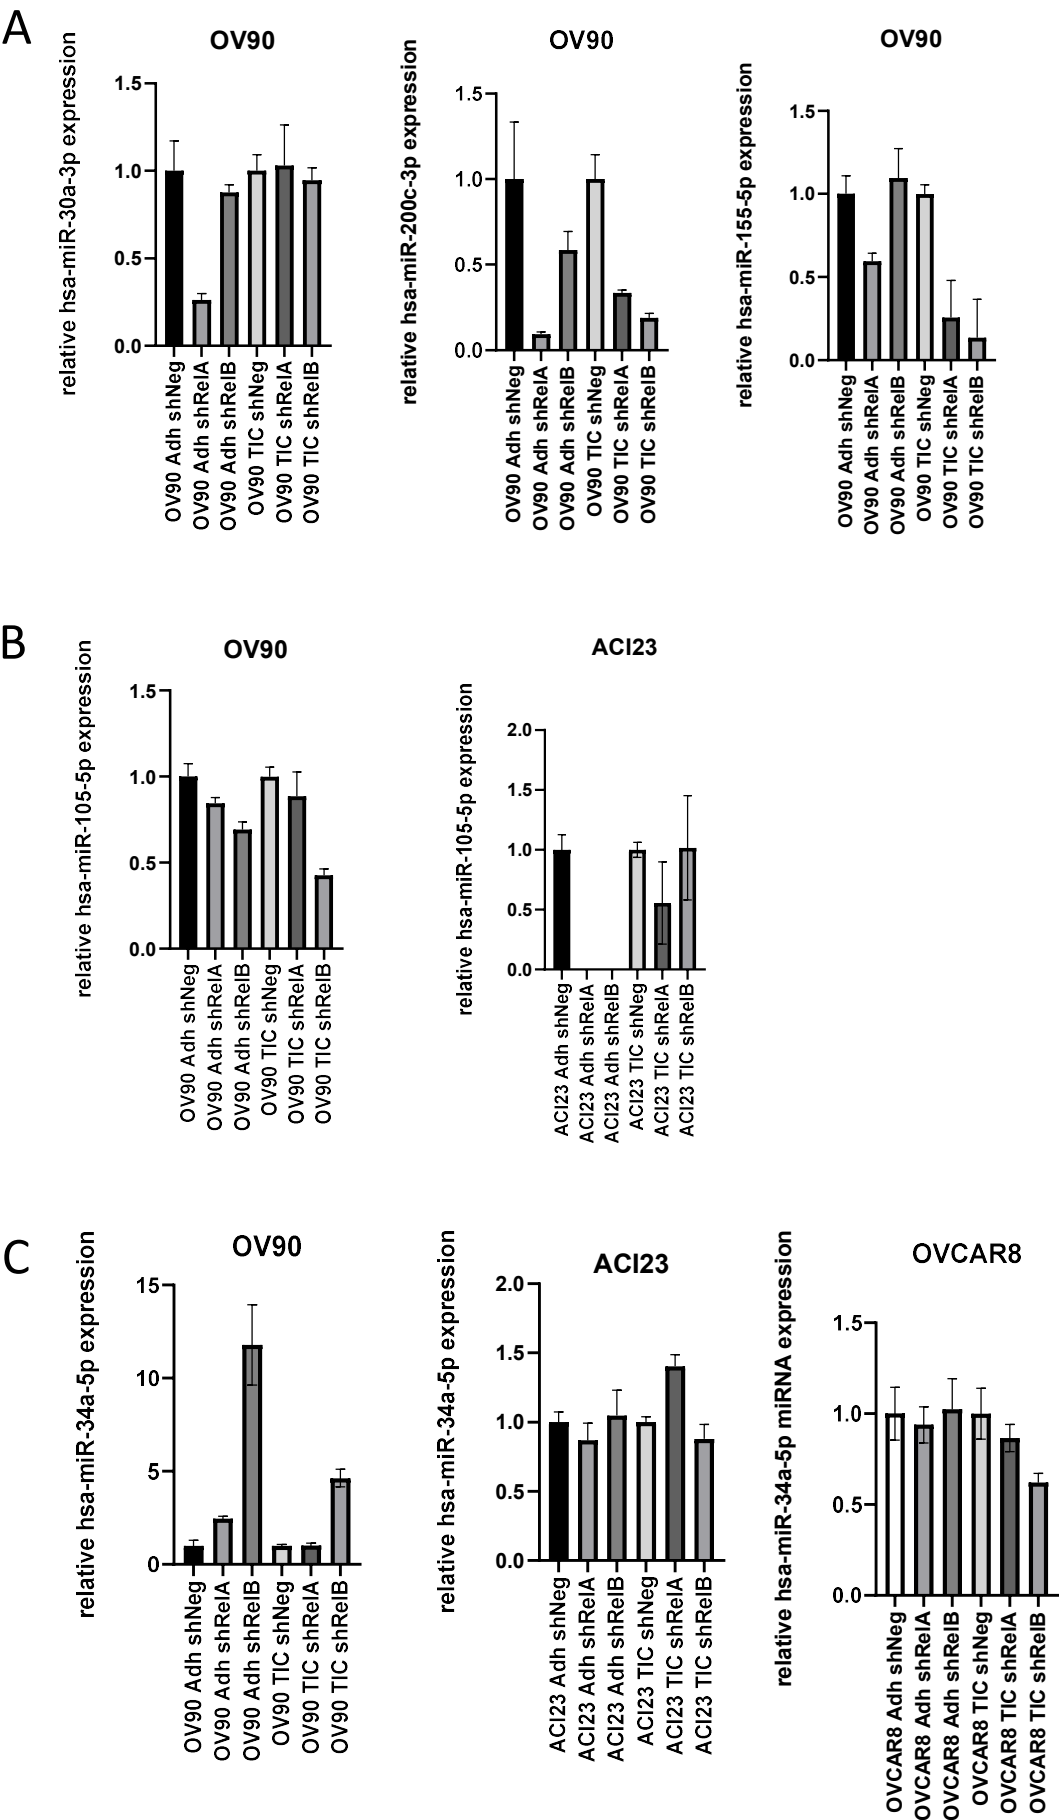

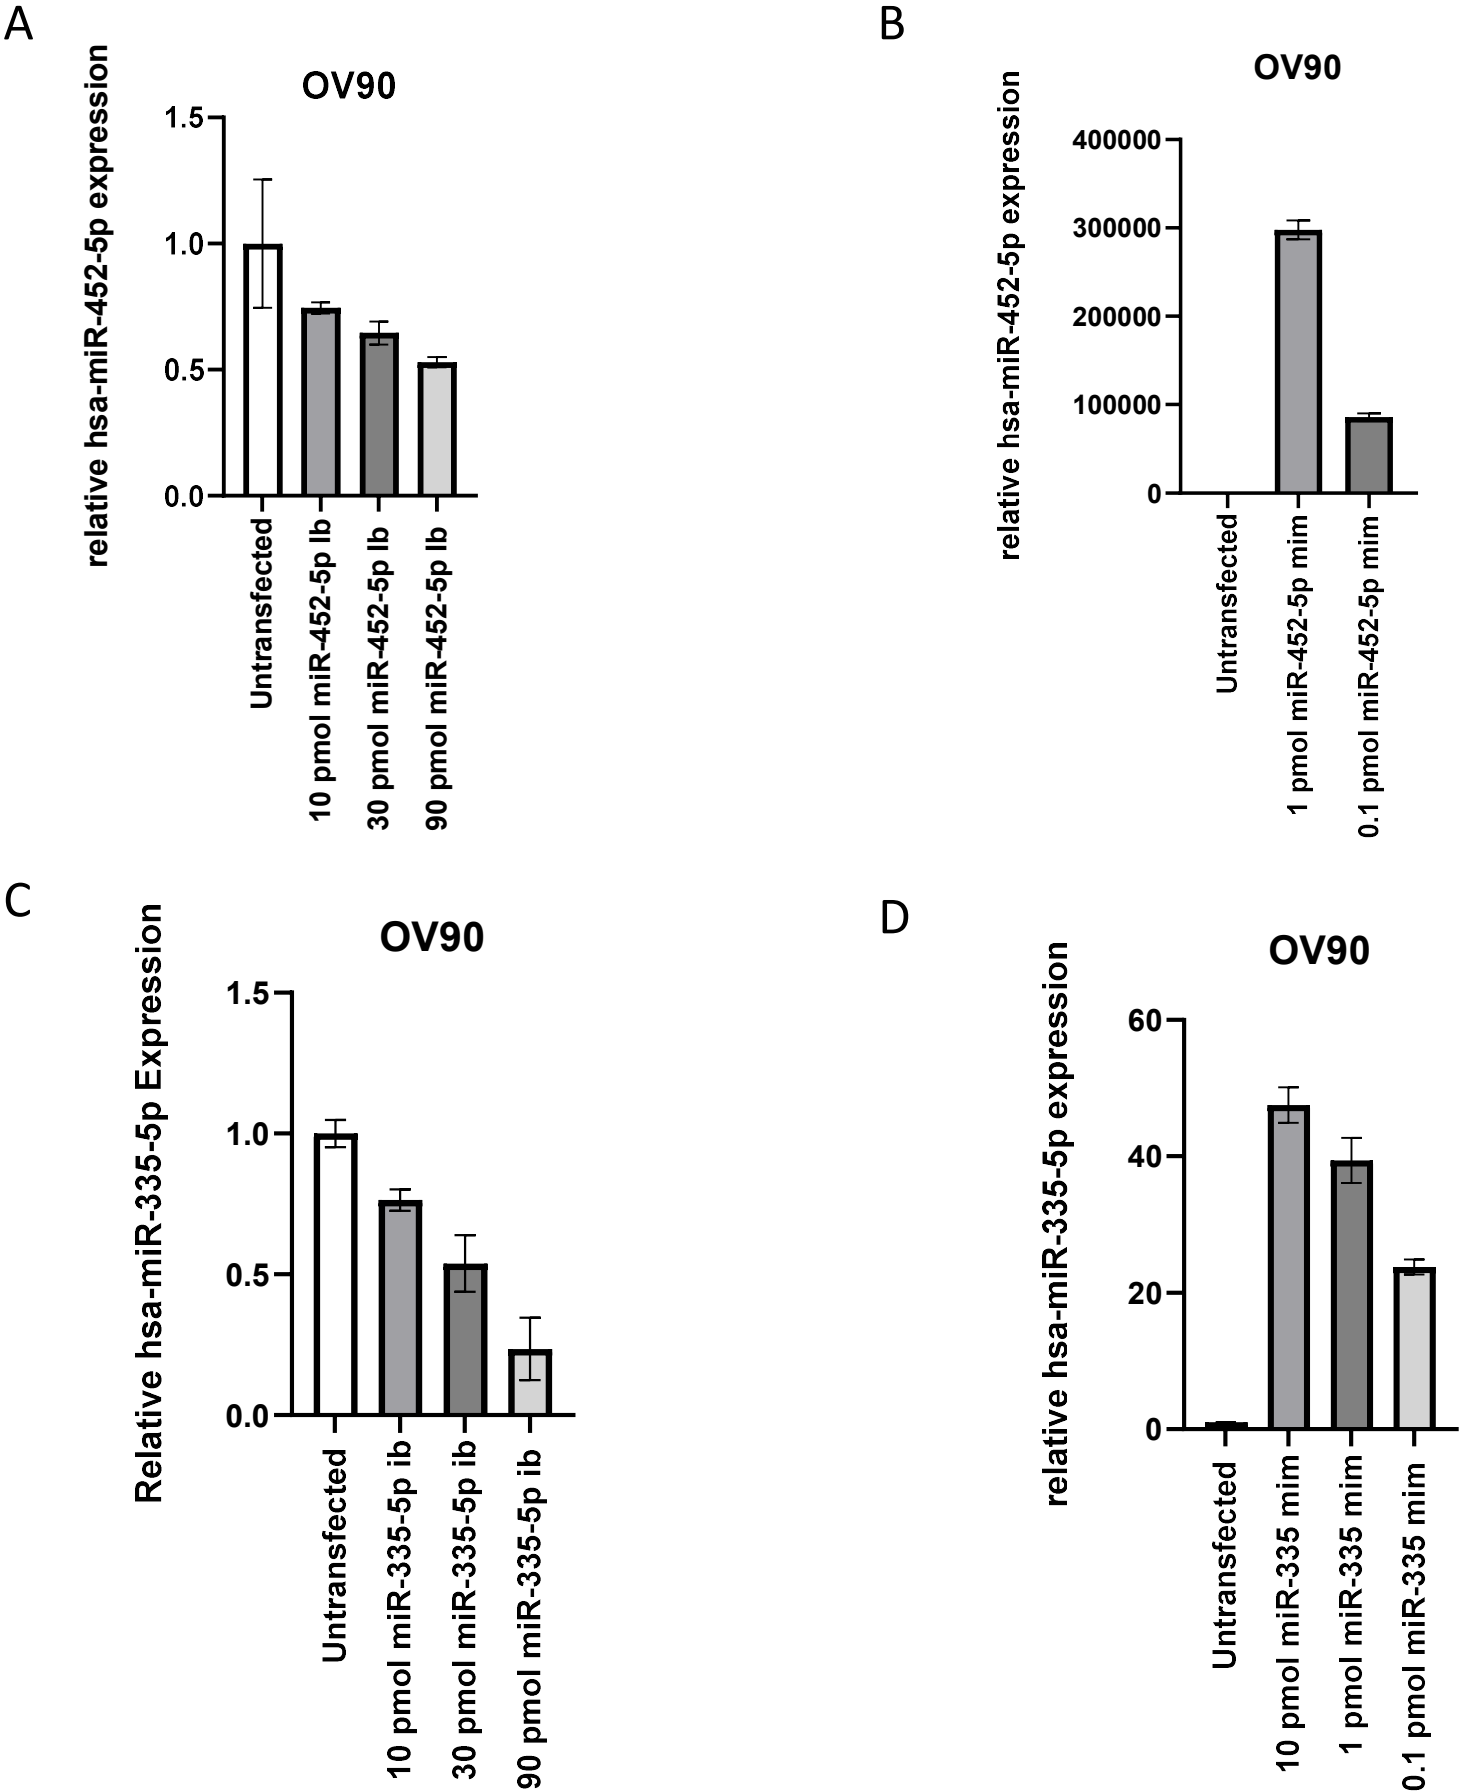

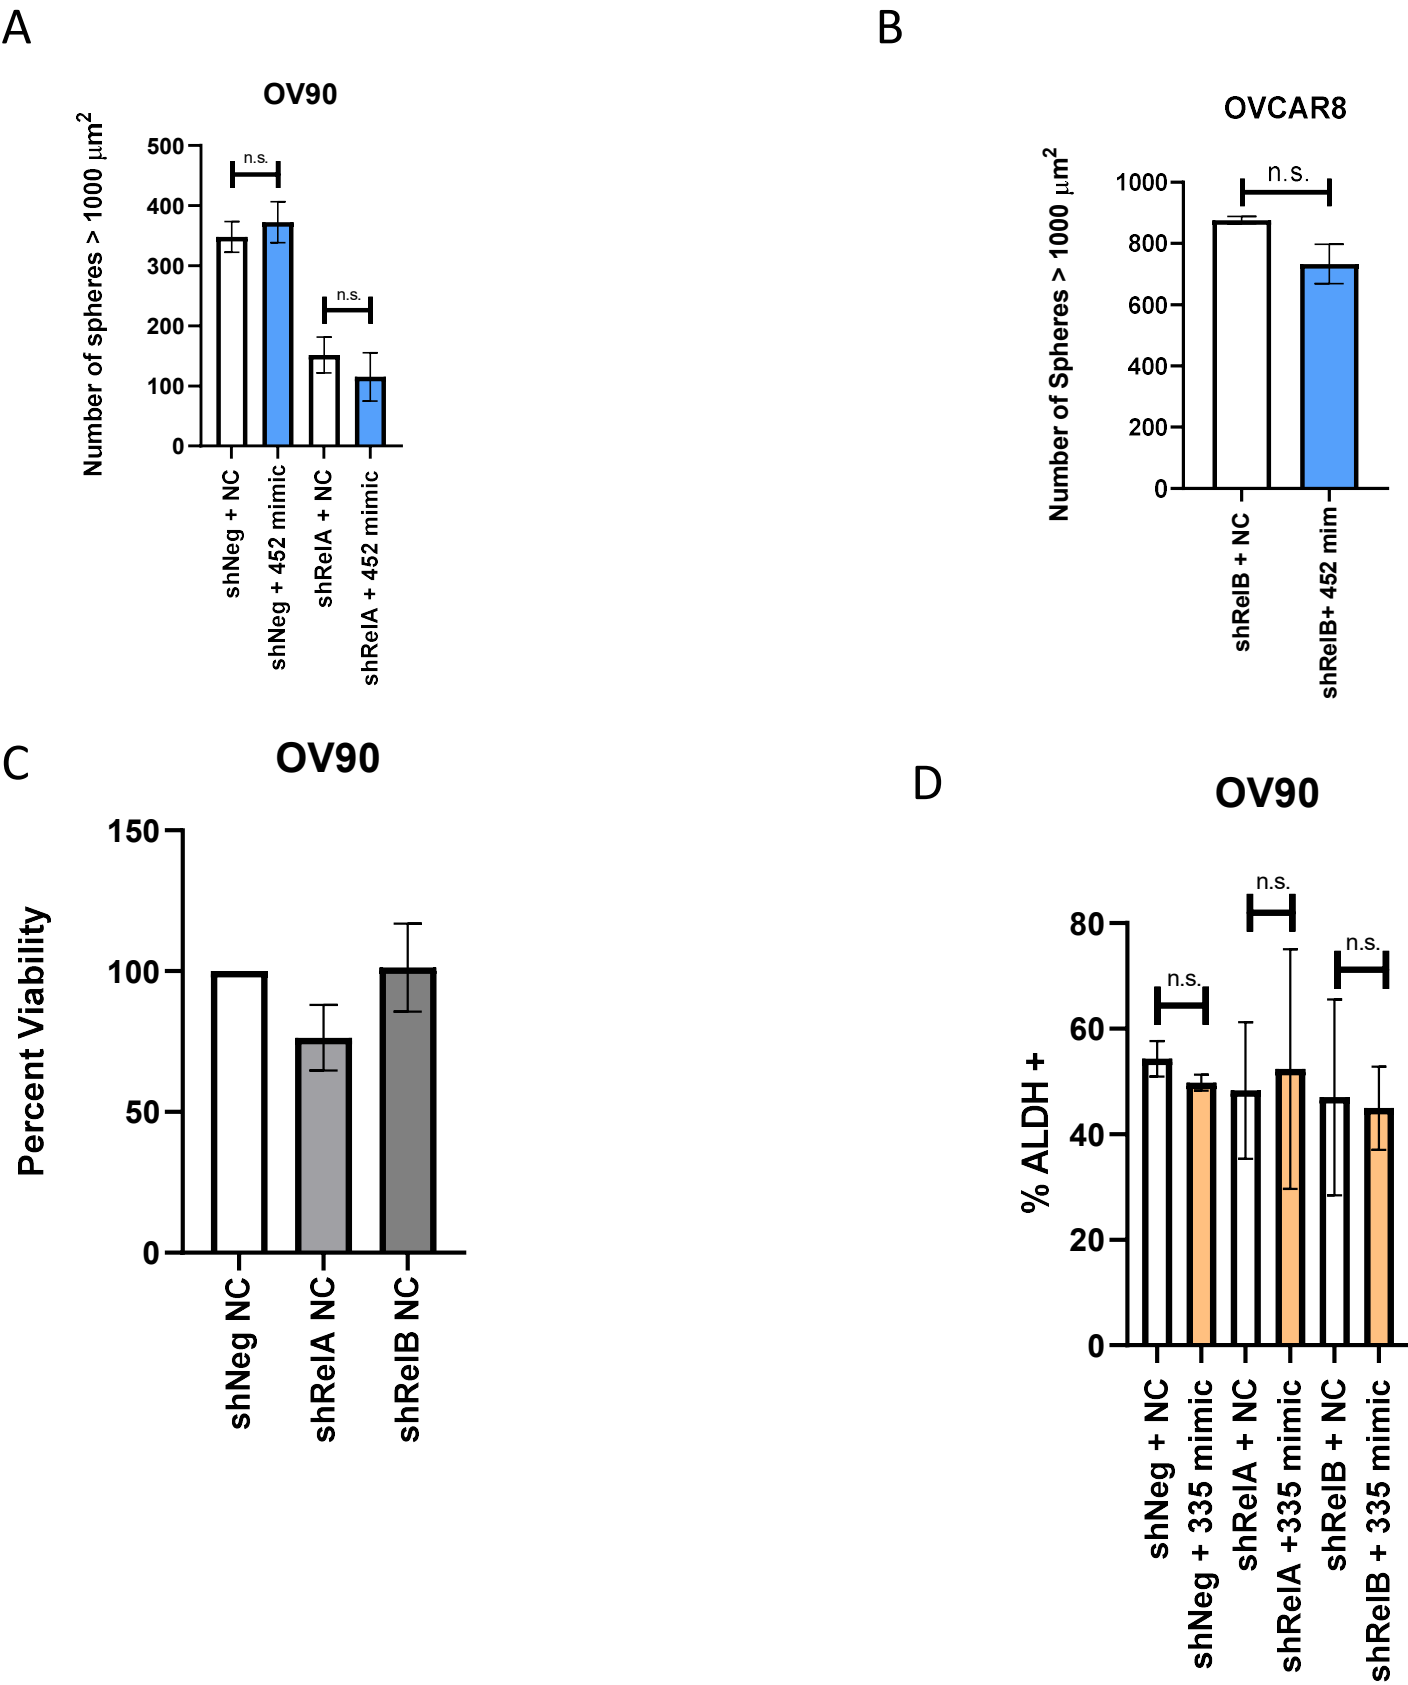

A

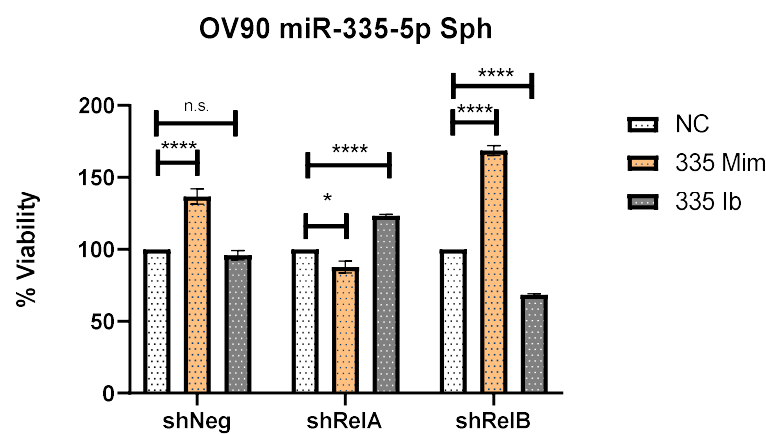

B

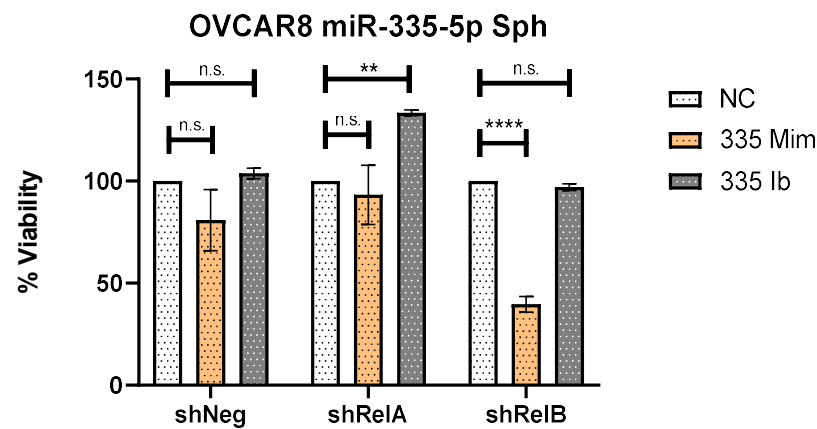

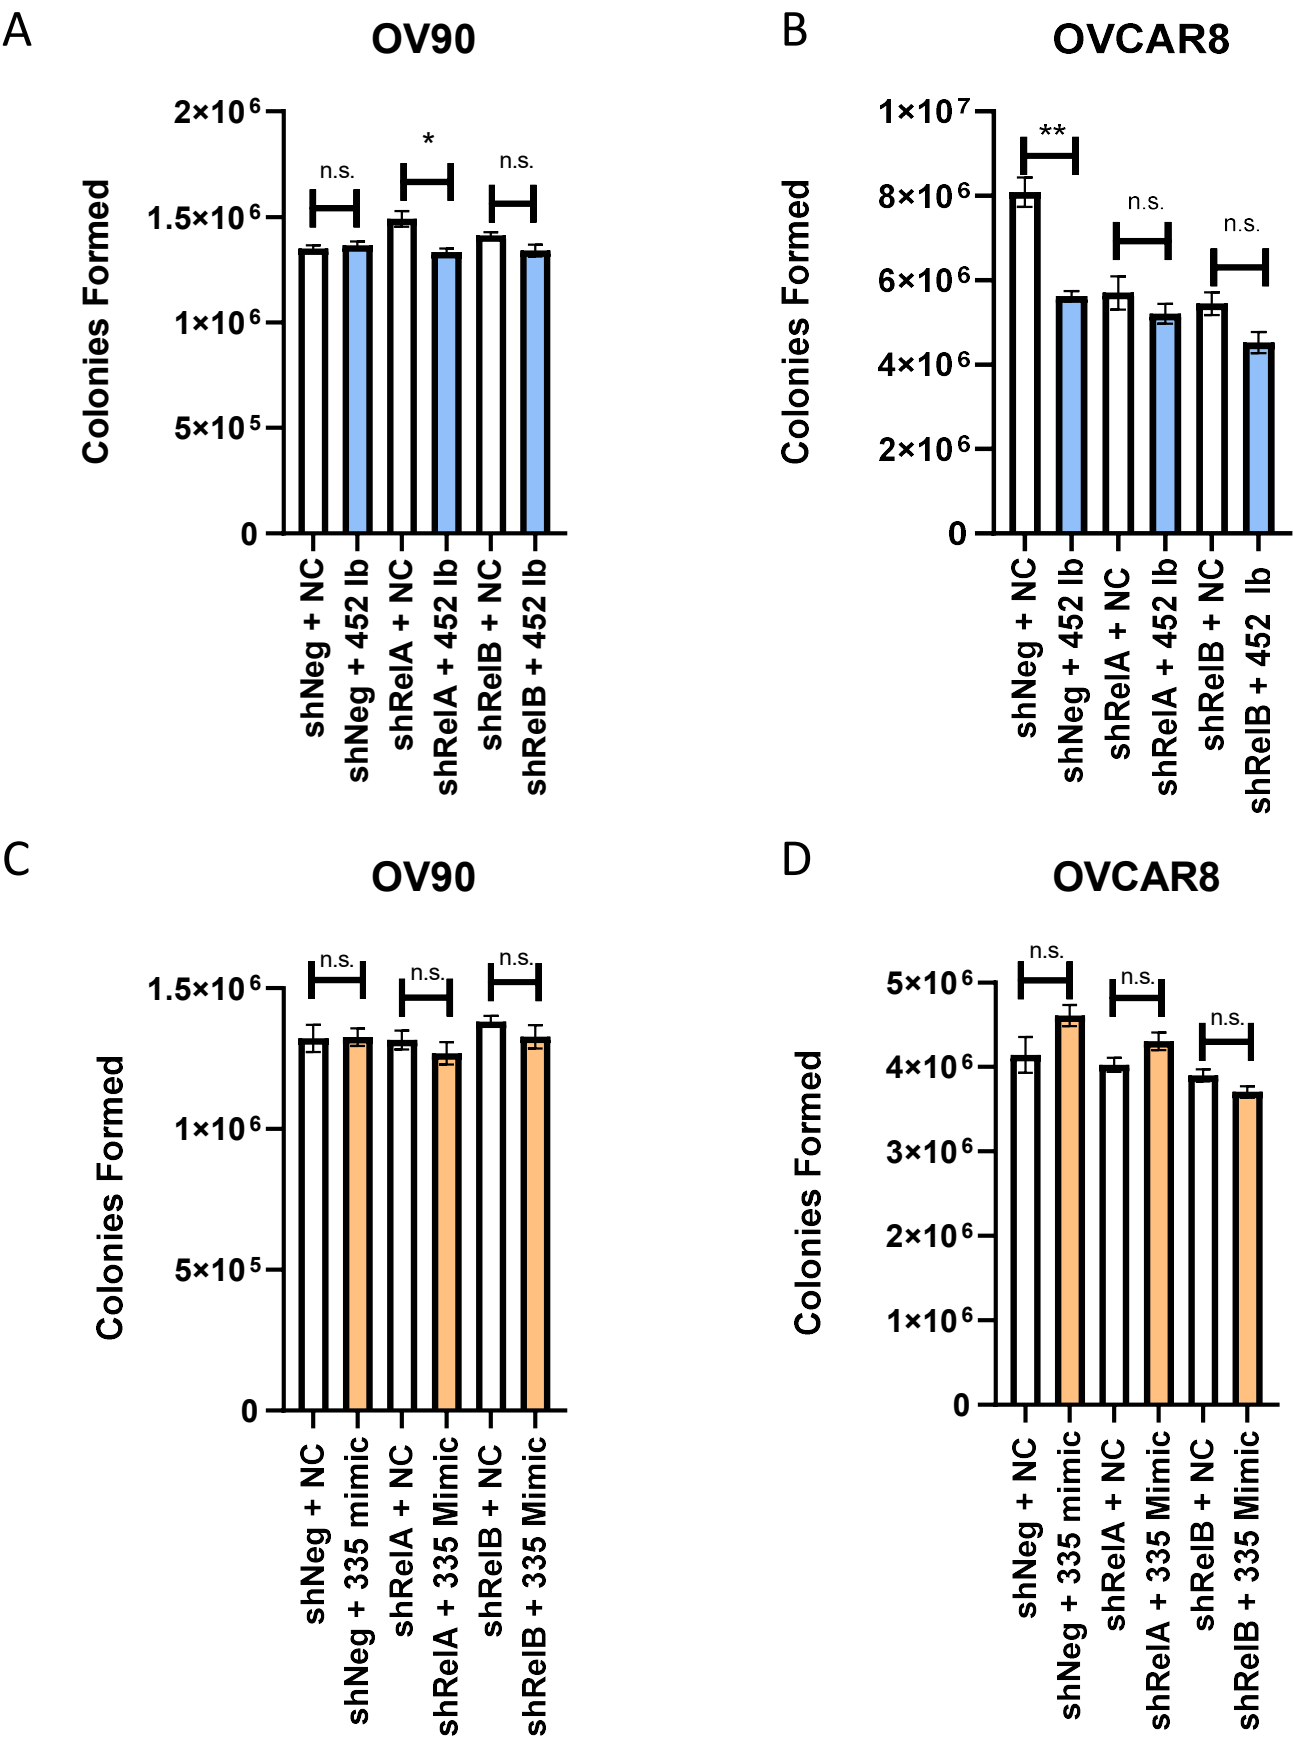

Supplement: s1 [file s1]
